# Supplementary material for: The GTPase Rab26 links synaptic vesicles to the autophagy pathway
Source: eLife journal article supplement (doi:10.7554/elife.05597), 2015-02-02

Figure 3-figure supplement 1. EGFP-Rab26WT colocalizes with the secretory neuropeptide Y (NPY) but not with EEA1 in neurites.

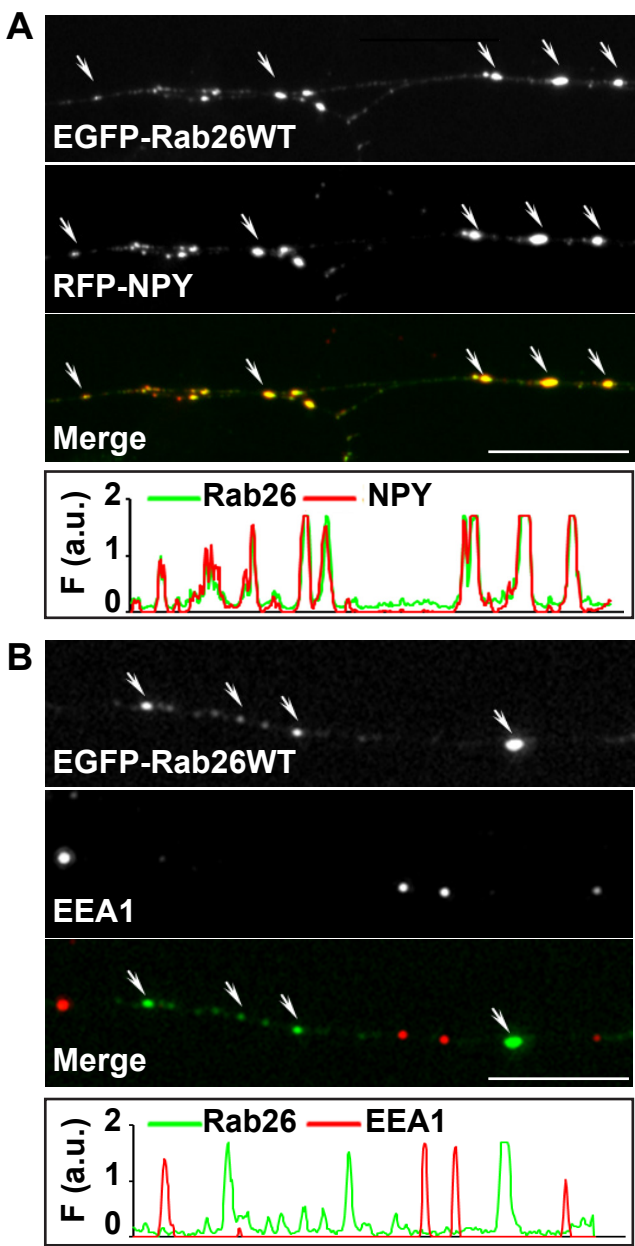

Supplement: supp [file elife_poa_e05597_Figure_3_figure_supplement_1.pdf › elife_poa_e05597_Figure_3_figure_supplement_1.pdf]
