# Supplementary material for: The GTPase Rab26 links synaptic vesicles to the autophagy pathway
Source: eLife journal article supplement (doi:10.7554/elife.05597), 2015-02-02

Figure 3-figure supplement 2. Rab26 does not colocalize with the presynaptic scaffold protein Brp in *Drosophila* neuromuscular junctions.

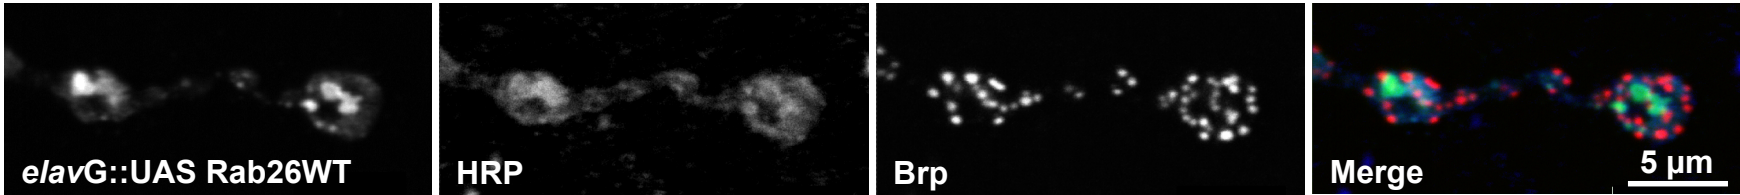

Supplement: supp [file elife_poa_e05597_Figure_3_figure_supplement_2.pdf › elife_poa_e05597_Figure_3_figure_supplement_2.pdf]
