# Supplementary material for: The GTPase Rab26 links synaptic vesicles to the autophagy pathway
Source: eLife journal article supplement (doi:10.7554/elife.05597), 2015-02-02

**Figure 5-figure supplement 1. EGFP-Rab26 induces massive vesicle clustering in neuronal cell bodies.**

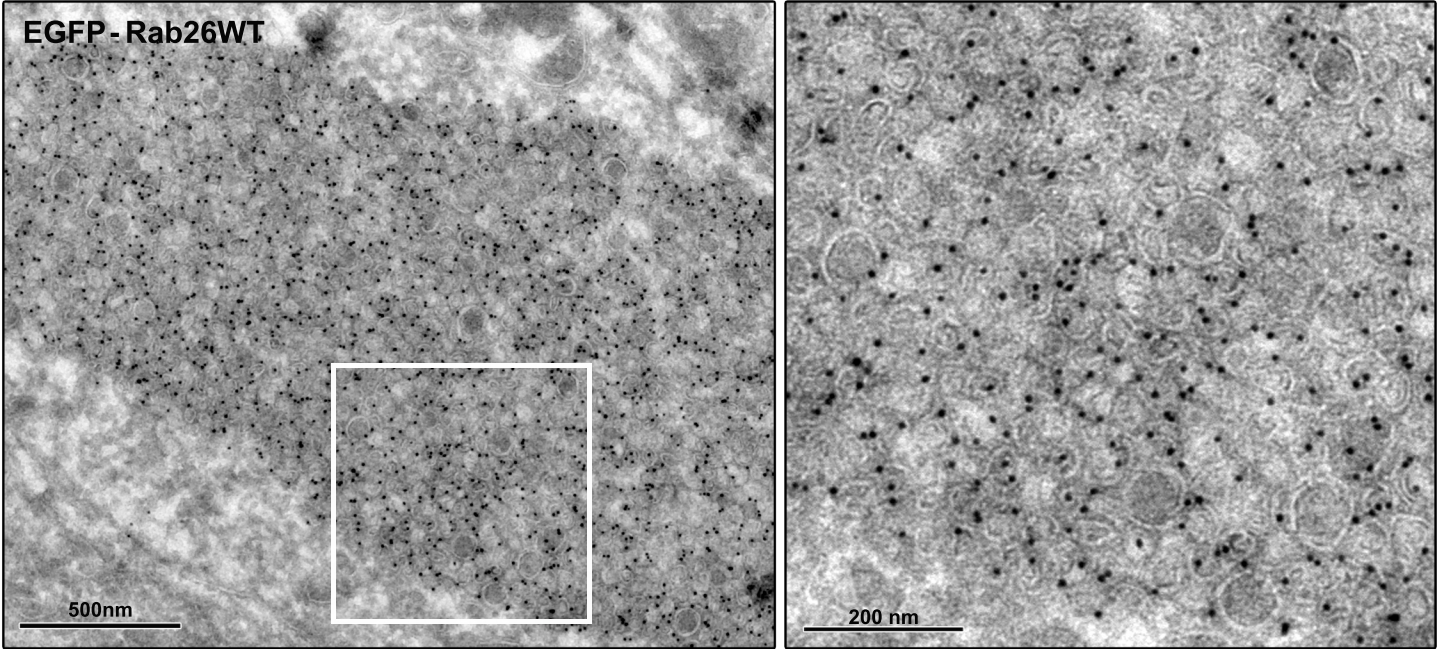

Supplement: supp [file elife_poa_e05597_Figure_5_figure_supplement_1.pdf › elife_poa_e05597_Figure_5_figure_supplement_1.pdf]
