# Supplementary figures and images for: The GTPase Rab26 links synaptic vesicles to the autophagy pathway
Source: eLife journal article supplement (doi:10.7554/elife.05597), 2015-02-02

Figure 6-figure supplement 1. Rab26 overexpression causes vesicle clusters in HeLa.

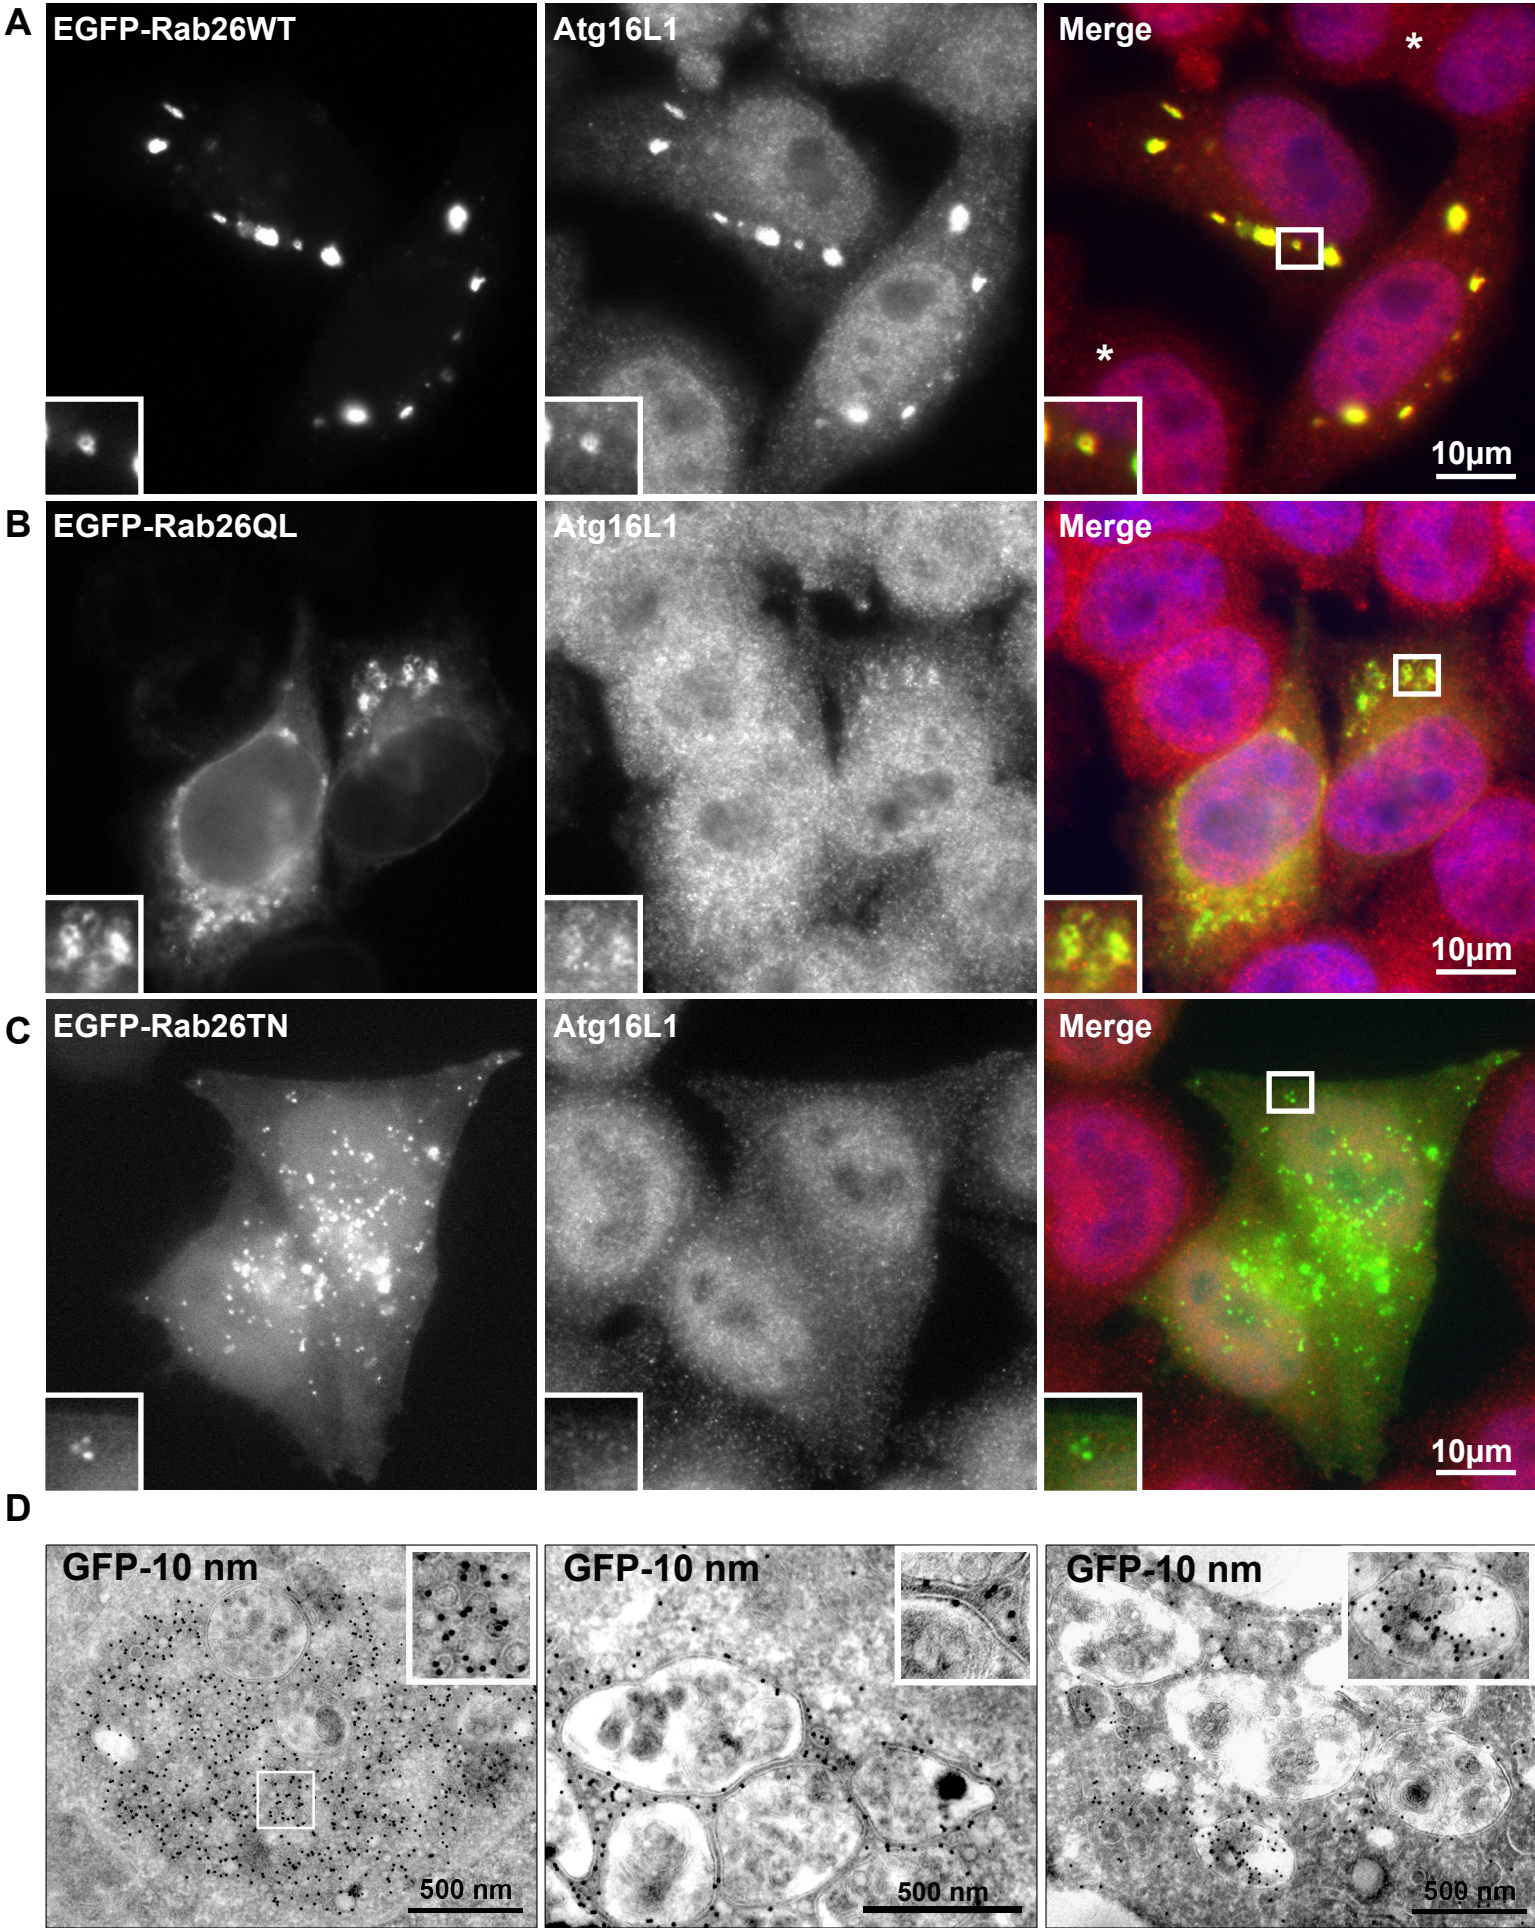

Supplement: supp [file elife_poa_e05597_Figure_6_figure_supplement_1.pdf › elife_poa_e05597_Figure_6_figure_supplement_1.pdf]

Figure 7-figure supplement 1. Analyses of Rab26 and ATG16L1 interaction by analytical gel filtration.

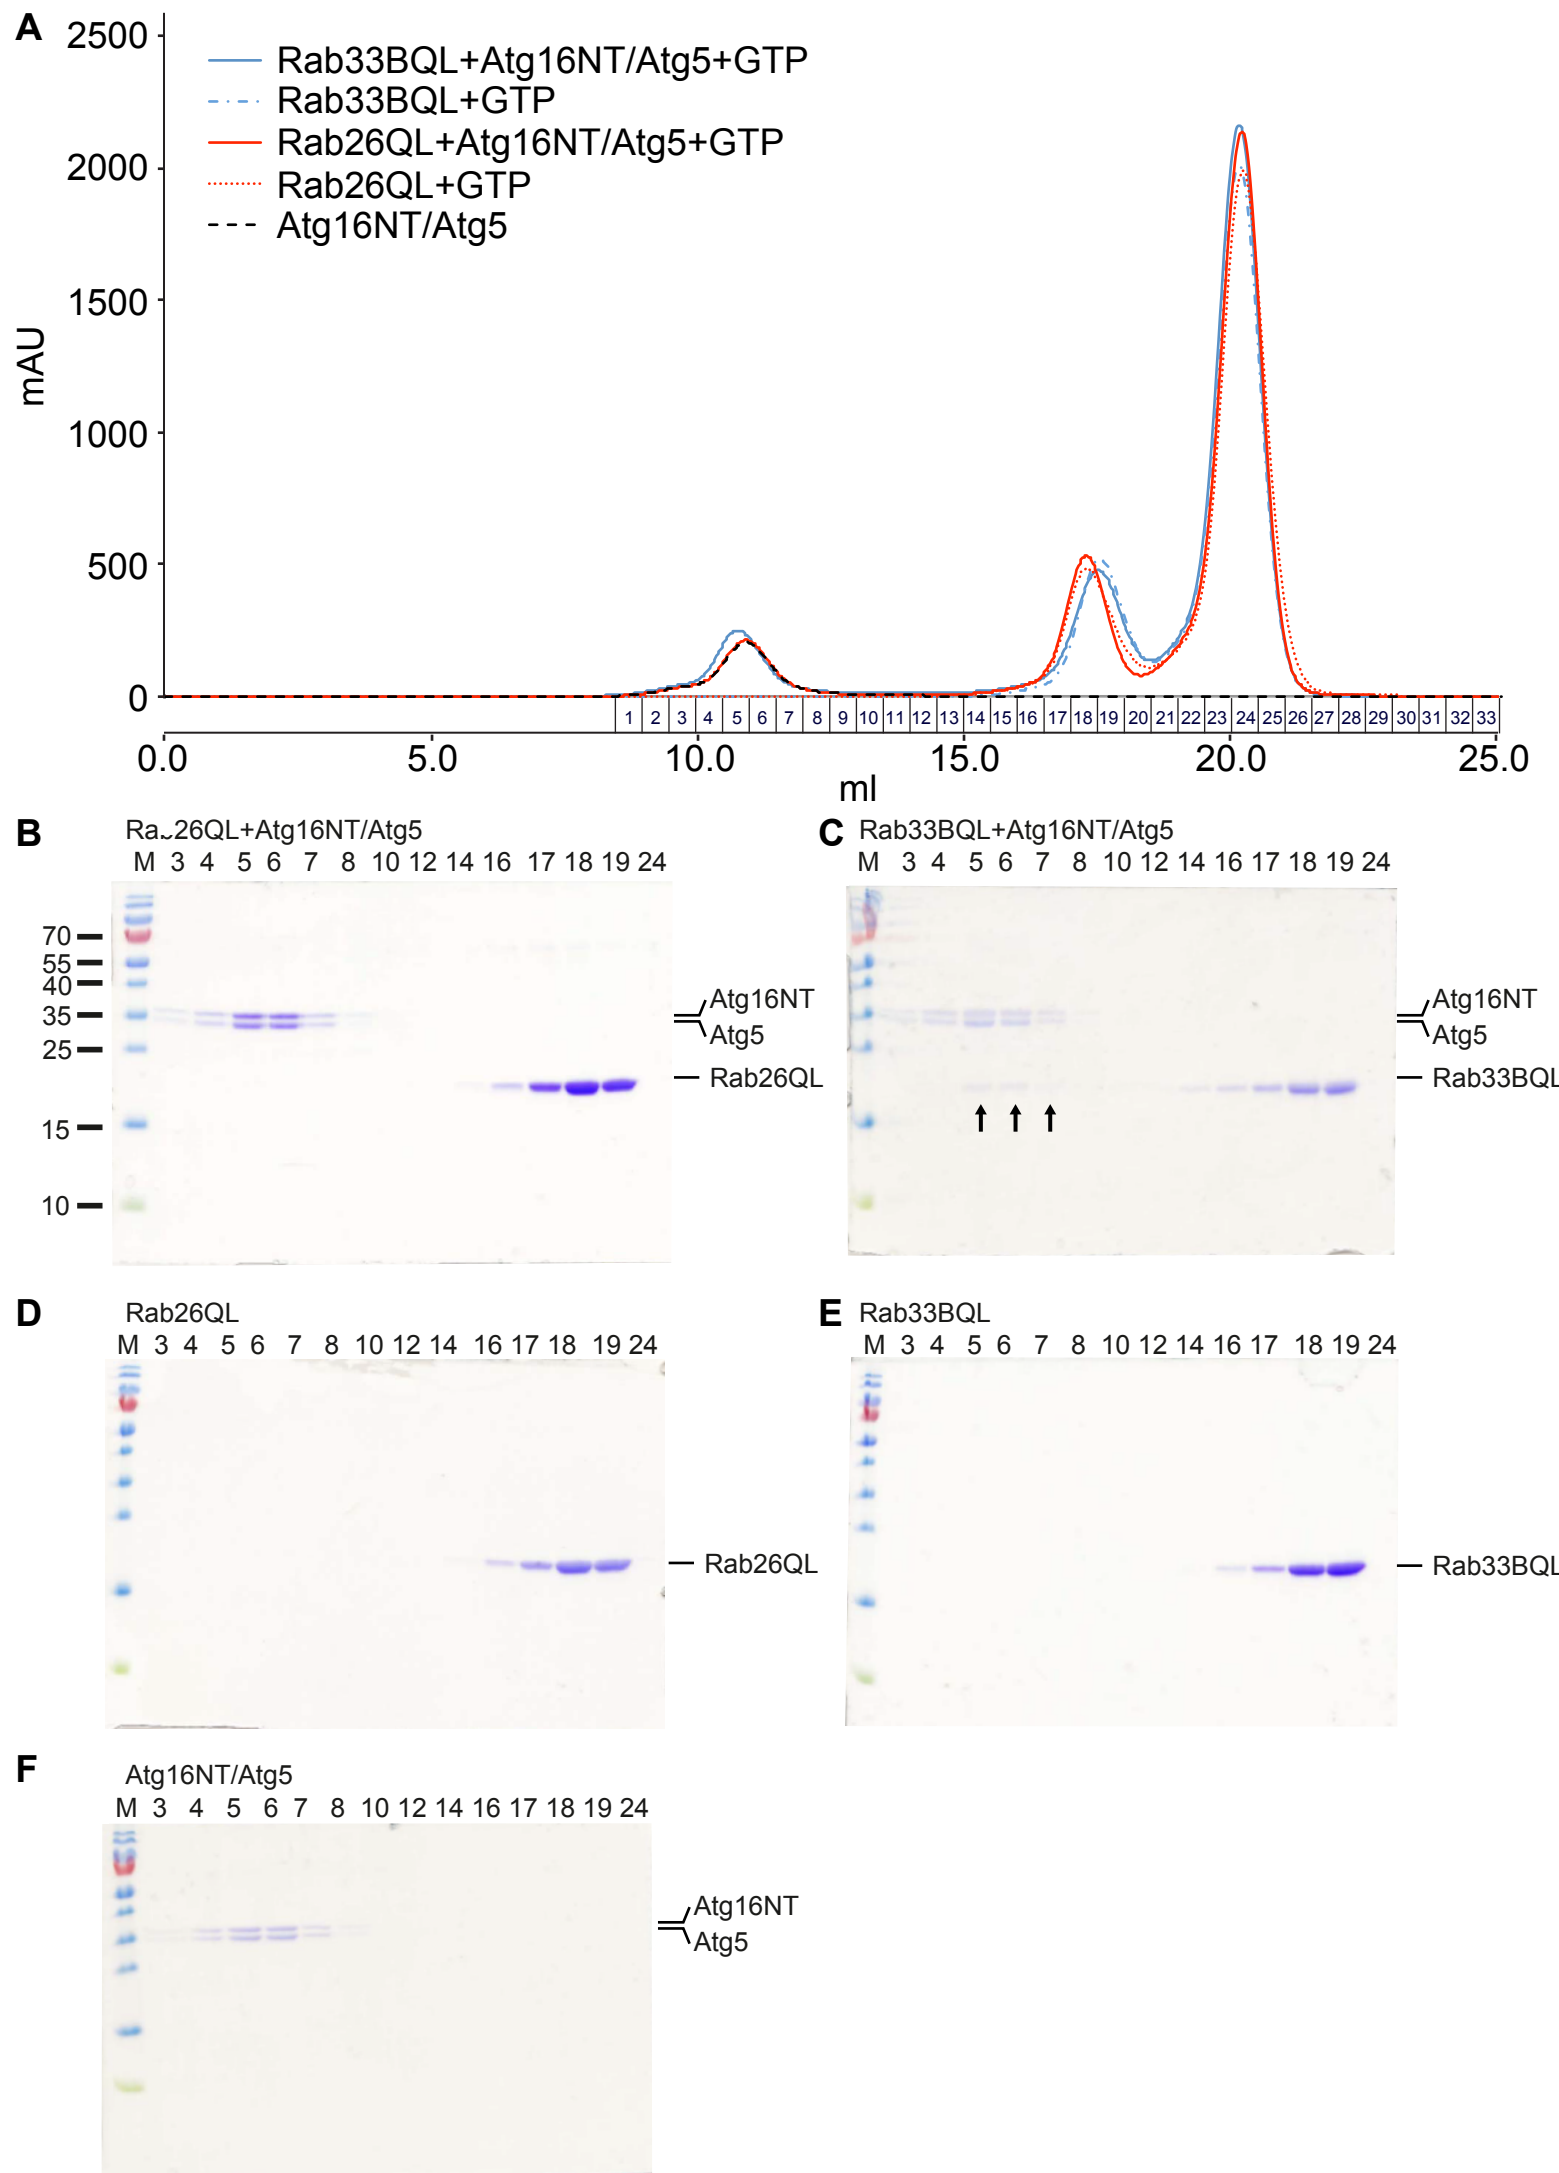

Supplement: supp [file elife_poa_e05597_Figure_7_figure_supplement_1.pdf › elife_poa_e05597_Figure_7_figure_supplement_1.pdf]
